# Supplementary material
Source: PubMed Central journal article supplement (PMC2442522)
Supplement: pp.108.118125_1.pdf [file pp.108.118125_1.pdf]

**Table S1.** Comparison of the partial sequences of genes in *Arabidopsis* and *Thellungiella* and among *Thellungiella* ecotypes

Expected real-time PCR product and its flanking nucleotide sequences were amplified by regular PCR from cDNA of *Arabidopsis* and *Thellungiella* ecotypes. Sequences were aligned and similarities between species are shown.

| Gene          | Product size (bases) | Similarity in <i>Arabidopsis</i> and <i>Thellungiella</i> (%) | Similarity in <i>Thellungiella</i> ecotypes Shandong and Yukon (%) |
|---------------|----------------------|---------------------------------------------------------------|--------------------------------------------------------------------|
| <i>NRT1.1</i> | 400                  | 90                                                            | 100                                                                |
| <i>NRT2.1</i> | 650                  | 90                                                            | 99                                                                 |
| <i>NRT3.1</i> | 550                  | 80                                                            | 100                                                                |
| <i>CLCa</i>   | 440                  | 90                                                            | 100                                                                |
| <i>NLA</i>    | 800                  | 98                                                            | 100                                                                |
| <i>NR2</i>    | 405                  | 90                                                            | 100                                                                |
| <i>GS1.1</i>  | 540                  | 93                                                            | 100                                                                |
| <i>GS2</i>    | 524                  | 100                                                           | 100                                                                |
| <i>UBQ10</i>  | 506                  | 100                                                           | 100                                                                |
