# Supplementary material
Source: PubMed Central journal article supplement (PMC2442522)
Supplement: pp.108.118125_2.pdf [file pp.108.118125_2.pdf]

**Table S2.** Primers used for real-time PCR analysis of gene expression

F, forward primer; R, reverse primer.

| Gene Name     | Sequence (5' to 3')                                       |
|---------------|-----------------------------------------------------------|
| <i>NRT1.1</i> | F: CTTGATGCTTGGGACTTCCAA<br>R: CGGCCTCAATACAAAGAATCATG    |
| <i>NRT2.1</i> | F: TGCACATCATCATGGGAATCTT<br>R: GCATACCACAGAATCTTTCCGAAT  |
| <i>NRT3.1</i> | F: GTCAGCAAAACACAAGGCATATTC<br>R: TTCTGGATCGCCATGGATATATC |
| <i>CLCa</i>   | F: AAAACATCGCCGGTTACAAACT<br>R: CAGACCTGTCCAAAACCTATCTTGA |
| <i>NLA</i>    | F: TTTCTGCGAGCTCTCTGATT<br>R: TCTTCCCAATAGTCTCTGCAG       |
| <i>NR2</i>    | F: GGATGGTTAAATGGTTGAAACGA<br>R: ACTCTGGCTTATACCACCAACCTT |
| <i>GS1.1</i>  | F: ATGAGAAGCAAAGCCAGGACTCT<br>R: GCCTGTGCTTGAACCATCATAGT  |
| <i>GS1.3</i>  | F: TCATCGCCGAATACATATGGAT<br>R: TCGTAGTTCCACTTGGGAAGCT    |
| <i>GS1.4</i>  | F: TCATCGCCGAGTACATATGGATT<br>R: GTCCAGGCAAAGTCCTTGCTT    |
| <i>GS2</i>    | F: TACCCGCAAGCTATCTTCAGAGA<br>R: TCTCAGCAGCTTTAGCACGTTT   |
| <i>UBQ10</i>  | F: CTCTCTACCGTGATCAAGATGCA<br>R: TGATTGTCTTTCCGGTGAGAGTC  |
